# Supplementary material for: Inhibition of Protein N-Glycosylation Blocks SARS-CoV-2 Infection
Source: PubMed Central journal article supplement (PMC8844921; doi:10.1128/mbio.03718-21), 2022-02-15
Supplement: mbio.03718-21-sd003.pdf [file mbio.03718-21-sd003.pdf]

# Identified Spike Proteins

| Bio Sample Category / Sequence Coverage | Protein                                                                                           | Accession Number | Bio Sample / Category      | Protein Identification probability (Prob) | Exclusive unique peptide count (FPep) | Exclusive unique spectrum count (#Unique) | Total spectrum count (#Spv) | Percentage of total spectra (%Spv) | Percentage of amino acids identified (%Cov) | Protein molecular mass |
|-----------------------------------------|---------------------------------------------------------------------------------------------------|------------------|----------------------------|-------------------------------------------|---------------------------------------|-------------------------------------------|-----------------------------|------------------------------------|---------------------------------------------|------------------------|
| <b>1_Control_Purified_Virions</b>       |                                                                                                   |                  |                            |                                           |                                       |                                           |                             |                                    |                                             |                        |
|                                         | Surface glycoprotein OS=Severe acute respiratory syndrome coronavirus 2 OR=2697049 GN=S PE=4 SV=1 | ADATL82K9        | 1_Control_Purified_Virions | 99%                                       | 1                                     | 1                                         | 16                          | 0.0341%                            | 11.5%                                       | 141 kDa                |
|                                         | Surface glycoprotein OS=Severe acute respiratory syndrome coronavirus 2 OR=2697049 GN=S PE=4 SV=1 | ADATL8AB5        | 1_Control_Purified_Virions | 88%                                       | 0                                     | 0                                         | 8                           | 0.0170%                            | 2.2%                                        | 141 kDa                |
|                                         | Spike glycoprotein OS=Severe acute respiratory syndrome coronavirus 2 OR=2697049 GN=S PE=3 SV=1   | ADATG3UJL1       | 1_Control_Purified_Virions | 98%                                       | 0                                     | 0                                         | 5                           | 0.0106%                            | 1.5%                                        | 141 kDa                |
|                                         | Surface glycoprotein OS=Severe acute respiratory syndrome coronavirus 2 OR=2697049 GN=S PE=4 SV=1 | ADATL9F8Z        | 1_Control_Purified_Virions | 61%                                       | 0                                     | 0                                         | 7                           | 0.0149%                            | 2.9%                                        | 141 kDa                |
|                                         | Spike glycoprotein OS=Severe acute respiratory syndrome coronavirus 2 OR=2697049 GN=S PE=3 SV=1   | ADATD7LJ25       | 1_Control_Purified_Virions | 97%                                       | 0                                     | 0                                         | 10                          | 0.0213%                            | 3.7%                                        | 141 kDa                |
|                                         | Spike glycoprotein OS=Severe acute respiratory syndrome coronavirus 2 OR=2697049 GN=S PE=3 SV=1   | ADATD5SMN0       | 1_Control_Purified_Virions | 75%                                       | 0                                     | 0                                         | 5                           | 0.0106%                            | 4.9%                                        | 141 kDa                |
|                                         | Spike glycoprotein OS=Severe acute respiratory syndrome coronavirus 2 OR=2697049 GN=S PE=3 SV=1   | ADATD7G089       | 1_Control_Purified_Virions | 97%                                       | 1                                     | 1                                         | 1                           | 0.0021%                            | 2.3%                                        | 141 kDa                |

|                                        |                                                                                                   |               |                                 |     |   |   |    |         |       |         |
|----------------------------------------|---------------------------------------------------------------------------------------------------|---------------|---------------------------------|-----|---|---|----|---------|-------|---------|
| <b>1_Mock_Treated_Purified_Virions</b> |                                                                                                   |               |                                 |     |   |   |    |         |       |         |
|                                        | Surface glycoprotein OS=Severe acute respiratory syndrome coronavirus 2 OR=2697049 GN=S PE=4 SV=1 | ADATL9W8W_NDM | 1_Mock_Treated_Purified_Virions | 97% | 1 | 1 | 9  | 0.020%  | 12.4% | 140 kDa |
|                                        | Surface glycoprotein OS=Severe acute respiratory syndrome coronavirus 2 OR=2697049 GN=S PE=4 SV=1 | ADATL82K9     | 1_Mock_Treated_Purified_Virions | 94% | 0 | 0 | 15 | 0.0317% | 11.5% | 141 kDa |
|                                        | Surface glycoprotein OS=Severe acute respiratory syndrome coronavirus 2 OR=2697049 GN=S PE=4 SV=1 | ADATL8AB5     | 1_Mock_Treated_Purified_Virions | 82% | 0 | 0 | 8  | 0.018%  | 2.2%  | 141 kDa |
|                                        | Spike glycoprotein OS=Severe acute respiratory syndrome coronavirus 2 OR=2697049 GN=S PE=3 SV=1   | ADATG3UJL1    | 1_Mock_Treated_Purified_Virions | 82% | 0 | 0 | 4  | 0.0085% | 1.5%  | 141 kDa |
|                                        | Surface glycoprotein OS=Severe acute respiratory syndrome coronavirus 2 OR=2697049 GN=S PE=4 SV=1 | ADATL9F8Z     | 1_Mock_Treated_Purified_Virions | 98% | 1 | 1 | 9  | 0.020%  | 3.7%  | 141 kDa |
|                                        | Spike glycoprotein OS=Severe acute respiratory syndrome coronavirus 2 OR=2697049 GN=S PE=3 SV=1   | ADATD7LJ25    | 1_Mock_Treated_Purified_Virions | 92% | 0 | 0 | 10 | 0.0212% | 3.7%  | 141 kDa |
|                                        | Spike glycoprotein OS=Severe acute respiratory syndrome coronavirus 2 OR=2697049 GN=S PE=3 SV=1   | ADATD5SMN0    | 1_Mock_Treated_Purified_Virions | 90% | 1 | 1 | 5  | 0.0106% | 7.7%  | 141 kDa |
|                                        | Spike glycoprotein OS=Severe acute respiratory syndrome coronavirus 2 OR=2697049 GN=S PE=3 SV=1   | ADATG1W854    | 1_Mock_Treated_Purified_Virions | 97% | 1 | 1 | 2  | 0.0042% | 4.6%  | 141 kDa |
|                                        | Spike glycoprotein OS=Severe acute respiratory syndrome coronavirus 2 OR=2697049 GN=S PE=3 SV=1   | ADATD7G089    | 1_Mock_Treated_Purified_Virions | 86% | 1 | 1 | 1  | 0.0021% | 2.3%  | 141 kDa |

|                                            |                                                                                                   |               |                                     |      |   |   |    |         |       |         |
|--------------------------------------------|---------------------------------------------------------------------------------------------------|---------------|-------------------------------------|------|---|---|----|---------|-------|---------|
| <b>3_PNGase_F_Treated_Purified_Virions</b> |                                                                                                   |               |                                     |      |   |   |    |         |       |         |
|                                            | Surface glycoprotein OS=Severe acute respiratory syndrome coronavirus 2 OR=2697049 GN=S PE=4 SV=1 | ADATL9W8W_NDM | 3_PNGase_F_Treated_Purified_Virions | 100% | 3 | 4 | 66 | 0.1384% | 37.3% | 140 kDa |
|                                            | Surface glycoprotein OS=Severe acute respiratory syndrome coronavirus 2 OR=2697049 GN=S PE=4 SV=1 | ADATL82K9     | 3_PNGase_F_Treated_Purified_Virions | 93%  | 0 | 0 | 59 | 0.1237% | 30.7% | 141 kDa |
|                                            | Surface glycoprotein OS=Severe acute respiratory syndrome coronavirus 2 OR=2697049 GN=S PE=4 SV=1 | ADATL8AB5     | 3_PNGase_F_Treated_Purified_Virions | 98%  | 0 | 0 | 37 | 0.0778% | 14.9% | 141 kDa |
|                                            | Spike glycoprotein OS=Severe acute respiratory syndrome coronavirus 2 OR=2697049 GN=S PE=3 SV=1   | ADATG3UJL1    | 3_PNGase_F_Treated_Purified_Virions | 100% | 0 | 0 | 37 | 0.0778% | 13.9% | 141 kDa |
|                                            | Surface glycoprotein OS=Severe acute respiratory syndrome coronavirus 2 OR=2697049 GN=S PE=4 SV=1 | ADATL9F8Z     | 3_PNGase_F_Treated_Purified_Virions | 80%  | 0 | 0 | 32 | 0.0671% | 16.3% | 141 kDa |
|                                            | Spike glycoprotein OS=Severe acute respiratory syndrome coronavirus 2 OR=2697049 GN=S PE=3 SV=1   | ADATD7LJ25    | 3_PNGase_F_Treated_Purified_Virions | 88%  | 0 | 0 | 30 | 0.0629% | 13.0% | 141 kDa |
|                                            | Spike glycoprotein OS=Severe acute respiratory syndrome coronavirus 2 OR=2697049 GN=S PE=3 SV=1   | ADATD5SMN0    | 3_PNGase_F_Treated_Purified_Virions | 85%  | 0 | 0 | 7  | 0.0147% | 13.5% | 141 kDa |

**4\_Inactivated\_PMGase-F\_Treated\_Purified\_Virions**

| Accession | Protein                                                                                | Accession | Protein                                         | Count | Label | Count | Label | Count   | Label | Count | Label | Count | Label |
|-----------|----------------------------------------------------------------------------------------|-----------|-------------------------------------------------|-------|-------|-------|-------|---------|-------|-------|-------|-------|-------|
| AD47820X  | Surface glycoprotein OS=Severe acute respiratory syndrome coronavirus 2 GN=5 PE=4 SV=1 | AD47820X  | 4_Inactivated_PMGase-F_Treated_Purified_Virions | 926   | 0     | 0     | 46    | 0.3078% | 24.5% | 143   | kDa   |       |       |
| AD478485  | Surface glycoprotein OS=Severe acute respiratory syndrome coronavirus 2 GN=5 PE=4 SV=1 | AD478485  | 4_Inactivated_PMGase-F_Treated_Purified_Virions | 945   | 0     | 0     | 27    | 0.630%  | 13.5% | 143   | kDa   |       |       |
| AD478411  | Spike glycoprotein OS=Severe acute respiratory syndrome coronavirus 2 GN=5 PE=3 SV=1   | AD478411  | 4_Inactivated_PMGase-F_Treated_Purified_Virions | 945   | 0     | 0     | 28    | 0.653%  | 13.2% | 143   | kDa   |       |       |
| AD478782  | Surface glycoprotein OS=Severe acute respiratory syndrome coronavirus 2 GN=5 PE=4 SV=1 | AD478782  | 4_Inactivated_PMGase-F_Treated_Purified_Virions | 69%   | 0     | 0     | 23    | 0.537%  | 12.6% | 143   | kDa   |       |       |
| AD478715  | Spike glycoprotein OS=Severe acute respiratory syndrome coronavirus 2 GN=5 PE=3 SV=1   | AD478715  | 4_Inactivated_PMGase-F_Treated_Purified_Virions | 92%   | 0     | 0     | 19    | 0.444%  | 9.7%  | 143   | kDa   |       |       |
| AD478580  | Spike glycoprotein OS=Severe acute respiratory syndrome coronavirus 2 GN=5 PE=3 SV=1   | AD478580  | 4_Inactivated_PMGase-F_Treated_Purified_Virions | 79%   | 0     | 0     | 5     | 0.0117% | 6.2%  | 143   | kDa   |       |       |

\*All identified peptides are highlighted in orange. Modified Cys residues are highlighted in green. N-Deglycosylated peptides are indicated as dark blue-lined rectangles. Identified non-N-glycosylated peptides are indicated as gray-lined rectangles.  
 \*Note: All N-linked modifications. The label annotation was manually added following the accession number of the original Sake sequence to indicate that the asparagine (N) residues were in-silico modified to aspartic acid (D) by an in-house script, to account for an experimental N-deglycosylation by PMGase-F treatment.  
 \*Note that all sequences containing NDAs do not contain the ER Signal Peptide (MFVFLVLRVSS).
