# Supplementary material for: Inhibition of Protein N-Glycosylation Blocks SARS-CoV-2 Infection
Source: PubMed Central journal article supplement (PMC8844921; doi:10.1128/mbio.03718-21), 2022-02-15
Supplement: mbio.03718-21-sd005.pdf [file mbio.03718-21-sd005.pdf]

A

1

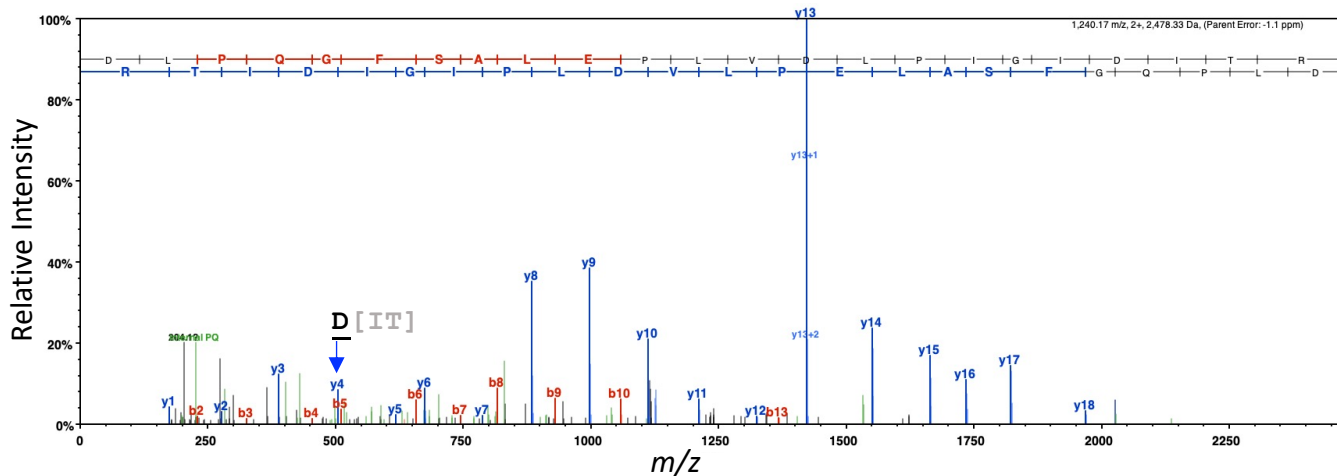

2

| B  | B Ions  | B+2H    | B-NH3 | B-H2O   | AA | Y Ions  | Y+2H    | Y-NH3   | Y-H2O   | Y  |
|----|---------|---------|-------|---------|----|---------|---------|---------|---------|----|
| 1  | 116.0   |         |       | 98.0    | D  | 2,479.3 | 1,240.2 | 2,462.3 | 2,461.3 | 23 |
| 2  | 229.1   |         |       | 211.1   | L  | 2,364.3 | 1,182.7 | 2,347.3 | 2,346.3 | 22 |
| 3  | 326.2   |         |       | 308.2   | P  | 2,251.2 | 1,126.1 | 2,234.2 | 2,233.2 | 21 |
| 4  | 454.2   |         |       | 437.2   | Q  | 2,154.2 | 1,077.6 | 2,137.2 | 2,136.2 | 20 |
| 5  | 511.3   |         |       | 494.2   | G  | 2,026.1 | 1,013.6 | 2,009.1 | 2,008.1 | 19 |
| 6  | 658.3   | 329.7   |       | 641.3   | F  | 1,969.1 | 985.1   | 1,952.1 | 1,951.1 | 18 |
| 7  | 745.4   | 373.2   |       | 728.3   | S  | 1,822.0 | 911.5   | 1,805.0 | 1,804.0 | 17 |
| 8  | 816.4   | 408.7   |       | 799.4   | A  | 1,735.0 | 868.0   | 1,718.0 | 1,717.0 | 16 |
| 9  | 929.5   | 465.2   |       | 912.4   | L  | 1,664.0 | 832.5   | 1,646.9 | 1,646.0 | 15 |
| 10 | 1,058.5 | 529.8   |       | 1,041.5 | E  | 1,550.9 | 775.9   | 1,533.9 | 1,532.9 | 14 |
| 11 | 1,155.6 | 578.3   |       | 1,138.5 | P  | 1,421.8 | 711.4   | 1,404.8 | 1,403.8 | 13 |
| 12 | 1,268.7 | 634.8   |       | 1,251.6 | L  | 1,324.8 | 662.9   | 1,307.8 | 1,306.8 | 12 |
| 13 | 1,367.7 | 684.4   |       | 1,350.7 | V  | 1,211.7 | 606.4   | 1,194.7 | 1,193.7 | 11 |
| 14 | 1,482.7 | 741.9   |       | 1,465.7 | D  | 1,112.6 | 556.8   | 1,095.6 | 1,094.6 | 10 |
| 15 | 1,595.8 | 798.4   |       | 1,578.8 | L  | 997.6   | 499.3   | 980.6   | 979.6   | 9  |
| 16 | 1,692.9 | 846.9   |       | 1,675.9 | P  | 884.5   | 442.8   | 867.5   | 866.5   | 8  |
| 17 | 1,806.0 | 903.5   |       | 1,788.9 | I  | 787.5   | 394.2   | 770.4   | 769.5   | 7  |
| 18 | 1,863.0 | 932.0   |       | 1,846.0 | G  | 674.4   | 337.7   | 657.4   | 656.4   | 6  |
| 19 | 1,976.1 | 988.5   |       | 1,959.0 | I  | 617.4   |         | 600.3   | 599.4   | 5  |
| 20 | 2,091.1 | 1,046.1 |       | 2,074.1 | D  | 504.3   |         | 487.3   | 486.3   | 4  |
| 21 | 2,204.2 | 1,102.6 |       | 2,187.2 | I  | 389.3   |         | 372.2   | 371.2   | 3  |
| 22 | 2,305.2 | 1,153.1 |       | 2,288.2 | T  | 276.2   |         | 259.1   | 258.2   | 2  |
| 23 | 2,479.3 | 1,240.2 |       | 2,462.3 | R  | 175.1   |         | 158.1   |         | 1  |

3

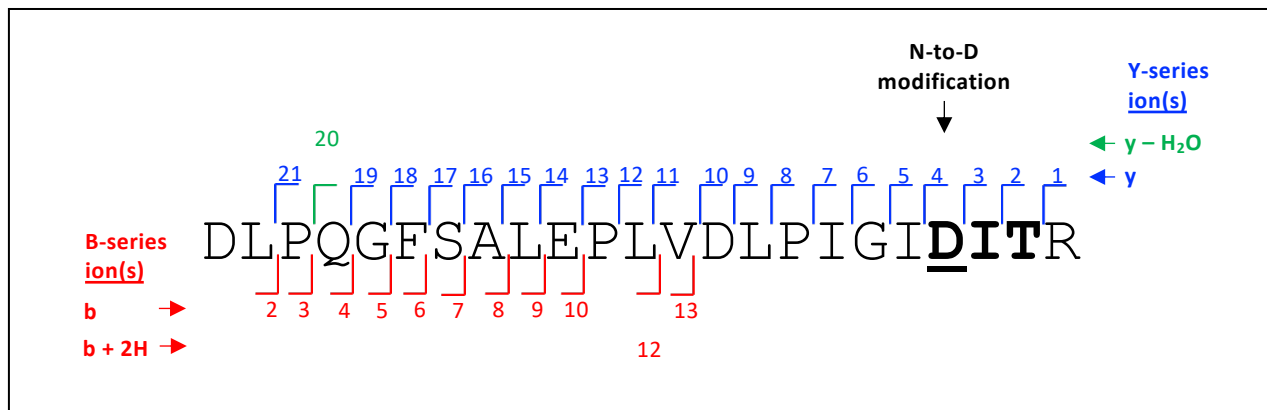

**B****1**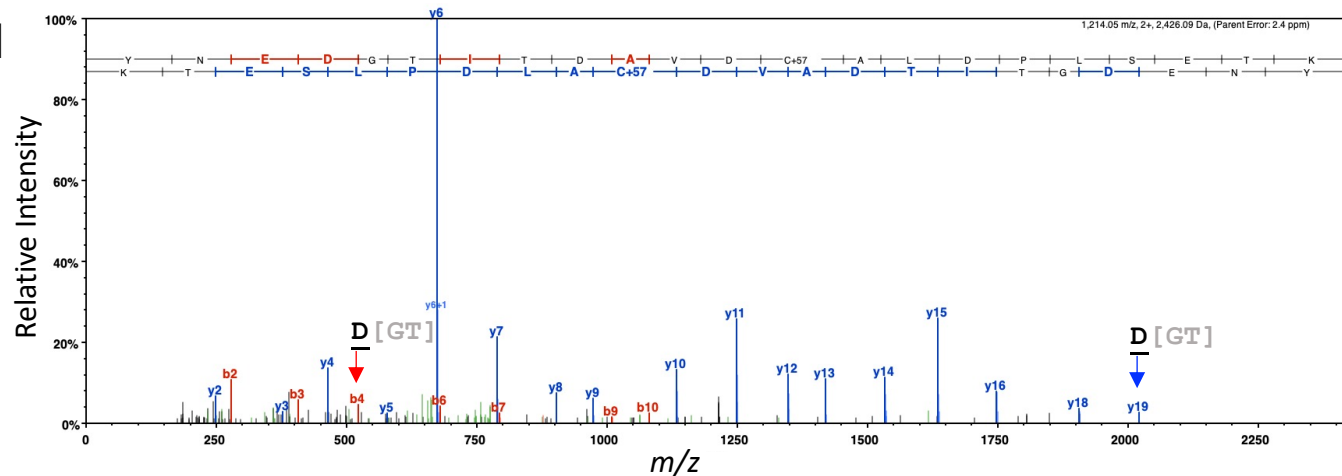**2**

| B  | B ions  | B+2H    | B-NH3   | B-H2O   | AA   | Y ions  | Y+2H    | Y-NH3   | Y-H2O   | Y  |
|----|---------|---------|---------|---------|------|---------|---------|---------|---------|----|
| 1  | 164.1   |         |         | 146.1   | Y    | 2,427.1 | 1,214.0 | 2,410.1 | 2,409.1 | 22 |
| 2  | 278.1   |         | 261.1   | 260.1   | N    | 2,264.0 | 1,132.5 | 2,247.0 | 2,246.0 | 21 |
| 3  | 407.2   |         | 390.1   | 389.1   | E    | 2,150.0 | 1,075.5 | 2,133.0 | 2,132.0 | 20 |
| 4  | 522.2   |         | 505.2   | 504.2   | D    | 2,020.9 | 1,011.0 | 2,003.9 | 2,002.9 | 19 |
| 5  | 579.2   |         | 562.2   | 561.2   | G    | 1,905.9 | 953.5   | 1,888.9 | 1,887.9 | 18 |
| 6  | 680.3   | 340.6   | 663.2   | 662.2   | T    | 1,848.9 | 924.9   | 1,831.9 | 1,830.9 | 17 |
| 7  | 793.3   | 397.2   | 776.3   | 775.3   | I    | 1,747.8 | 874.4   | 1,730.8 | 1,729.8 | 16 |
| 8  | 894.4   | 447.7   | 877.4   | 876.4   | T    | 1,634.8 | 817.9   | 1,617.7 | 1,616.7 | 15 |
| 9  | 1,009.4 | 505.2   | 992.4   | 991.4   | D    | 1,533.7 | 767.4   | 1,516.7 | 1,515.7 | 14 |
| 10 | 1,080.4 | 540.7   | 1,063.4 | 1,062.4 | A    | 1,418.7 | 709.8   | 1,401.7 | 1,400.7 | 13 |
| 11 | 1,179.5 | 590.3   | 1,162.5 | 1,161.5 | V    | 1,347.6 | 674.3   | 1,330.6 | 1,329.6 | 12 |
| 12 | 1,294.5 | 647.8   | 1,277.5 | 1,276.5 | D    | 1,248.6 | 624.8   | 1,231.6 | 1,230.6 | 11 |
| 13 | 1,454.6 | 727.8   | 1,437.5 | 1,436.6 | C+57 | 1,133.6 | 567.3   | 1,116.5 | 1,115.5 | 10 |
| 14 | 1,525.6 | 763.3   | 1,508.6 | 1,507.6 | A    | 973.5   | 487.3   | 956.5   | 955.5   | 9  |
| 15 | 1,638.7 | 819.9   | 1,621.7 | 1,620.7 | L    | 902.5   | 451.7   | 885.5   | 884.5   | 8  |
| 16 | 1,753.7 | 877.4   | 1,736.7 | 1,735.7 | D    | 789.4   | 395.2   | 772.4   | 771.4   | 7  |
| 17 | 1,850.8 | 925.9   | 1,833.7 | 1,832.8 | P    | 674.4   | 337.7   | 657.3   | 656.4   | 6  |
| 18 | 1,963.9 | 982.4   | 1,946.8 | 1,945.8 | L    | 573.3   |         | 560.3   | 559.3   | 5  |
| 19 | 2,050.9 | 1,025.9 | 2,033.9 | 2,032.9 | S    | 464.2   |         | 447.2   | 446.2   | 4  |
| 20 | 2,179.9 | 1,090.5 | 2,162.9 | 2,161.9 | E    | 377.2   |         | 360.2   | 359.2   | 3  |
| 21 | 2,281.0 | 1,141.0 | 2,264.0 | 2,263.0 | T    | 248.2   |         | 231.1   | 230.1   | 2  |
| 22 | 2,427.1 | 1,214.0 | 2,410.1 | 2,409.1 | K    | 147.1   |         | 130.1   | 129.1   | 1  |

**3**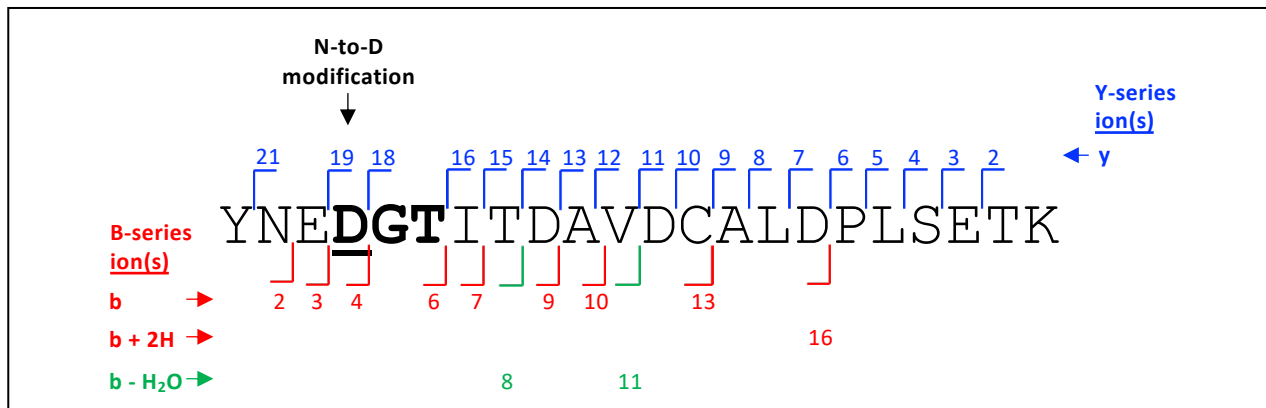

C

1

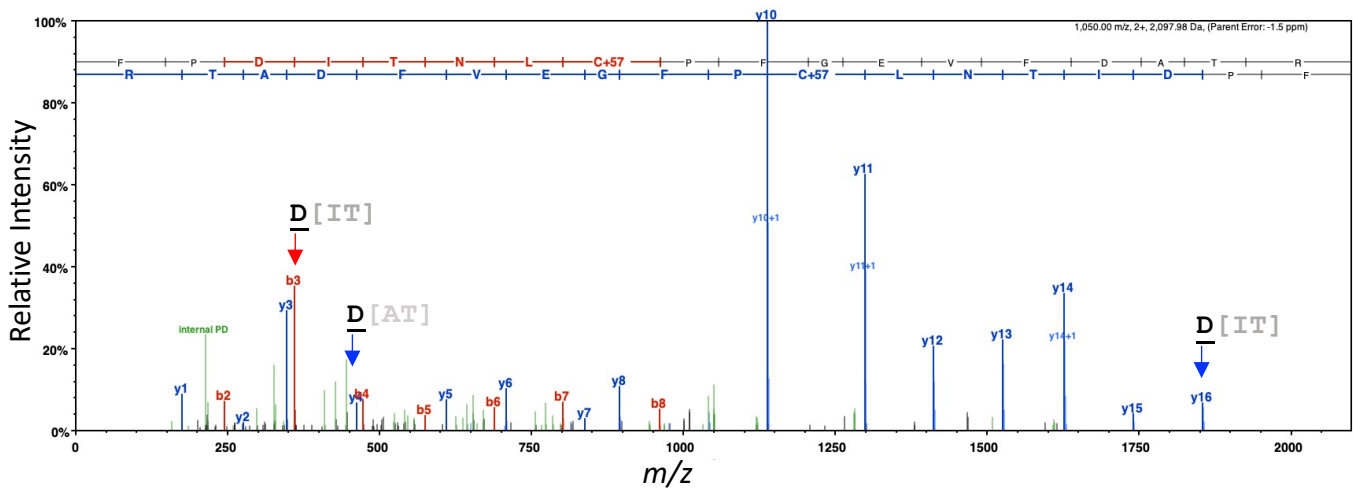

2

| B  | B ions  | B+2H    | B-NH3   | B-H2O   | AA   | Y ions  | Y+2H    | Y-NH3   | Y-H2O   | Y  |
|----|---------|---------|---------|---------|------|---------|---------|---------|---------|----|
| 1  | 148.1   |         |         |         | F    | 2,099.0 | 1,050.0 | 2,082.0 | 2,081.0 | 18 |
| 2  | 245.1   |         |         |         | P    | 1,951.9 | 976.5   | 1,934.9 | 1,933.9 | 17 |
| 3  | 360.2   |         |         | 342.1   | D    | 1,854.9 | 927.9   | 1,837.8 | 1,836.9 | 16 |
| 4  | 473.2   |         |         | 455.2   | I    | 1,739.8 | 870.4   | 1,722.8 | 1,721.8 | 15 |
| 5  | 574.3   |         |         | 556.3   | T    | 1,626.8 | 813.9   | 1,609.7 | 1,608.7 | 14 |
| 6  | 688.3   | 344.7   | 671.3   | 670.3   | N    | 1,525.7 | 763.4   | 1,508.7 | 1,507.7 | 13 |
| 7  | 801.4   | 401.2   | 784.4   | 783.4   | L    | 1,411.7 | 706.3   | 1,394.6 | 1,393.7 | 12 |
| 8  | 961.4   | 481.2   | 944.4   | 943.4   | C+57 | 1,298.6 | 649.8   | 1,281.6 | 1,280.6 | 11 |
| 9  | 1,058.5 | 529.8   | 1,041.5 | 1,040.5 | P    | 1,138.6 | 569.8   | 1,121.5 | 1,120.5 | 10 |
| 10 | 1,205.6 | 603.3   | 1,188.5 | 1,187.6 | F    | 1,041.5 | 521.3   | 1,024.5 | 1,023.5 | 9  |
| 11 | 1,262.6 | 631.8   | 1,245.6 | 1,244.6 | G    | 894.4   | 447.7   | 877.4   | 876.4   | 8  |
| 12 | 1,391.6 | 696.3   | 1,374.6 | 1,373.6 | E    | 837.4   | 419.2   | 820.4   | 819.4   | 7  |
| 13 | 1,490.7 | 745.9   | 1,473.7 | 1,472.7 | V    | 708.4   | 354.7   | 691.3   | 690.4   | 6  |
| 14 | 1,637.8 | 819.4   | 1,620.7 | 1,619.8 | F    | 609.3   |         | 592.3   | 591.3   | 5  |
| 15 | 1,752.8 | 876.9   | 1,735.8 | 1,734.8 | D    | 462.2   |         | 445.2   | 444.2   | 4  |
| 16 | 1,823.8 | 912.4   | 1,806.8 | 1,805.8 | A    | 347.2   |         | 330.2   | 329.2   | 3  |
| 17 | 1,924.9 | 962.9   | 1,907.9 | 1,906.9 | T    | 276.2   |         | 259.1   | 258.2   | 2  |
| 18 | 2,099.0 | 1,050.0 | 2,082.0 | 2,081.0 | R    | 175.1   |         | 158.1   |         | 1  |

3

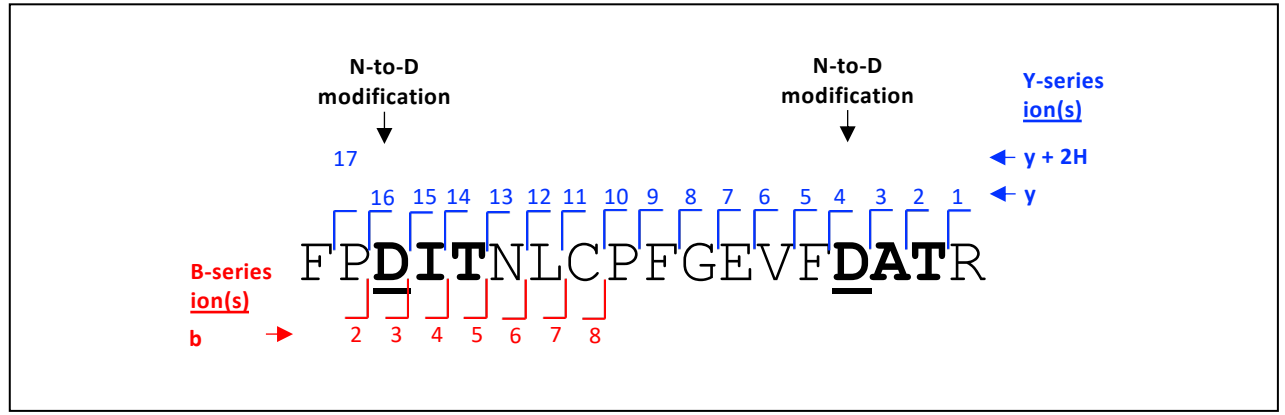

D

1

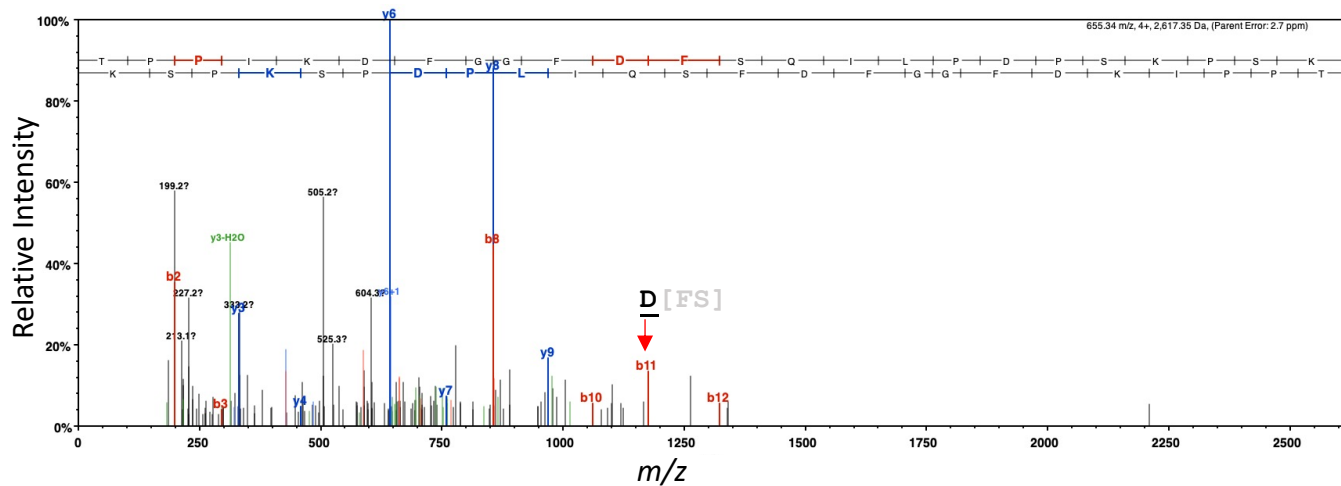

2

| B  | B Ions  | B+2H    | B-NH3   | B-H2O   | AA | Y Ions  | Y+2H    | Y-NH3   | Y-H2O   | Y  |
|----|---------|---------|---------|---------|----|---------|---------|---------|---------|----|
| 1  | 102.1   | 51.5    |         | 84.0    | T  | 2,618.4 | 1,309.7 | 2,601.3 | 2,600.3 | 24 |
| 2  | 199.1   | 100.1   |         | 181.1   | P  | 2,517.3 | 1,259.2 | 2,500.3 | 2,499.3 | 23 |
| 3  | 296.2   | 148.6   |         | 278.2   | P  | 2,420.2 | 1,210.6 | 2,403.2 | 2,402.2 | 22 |
| 4  | 409.2   | 205.1   |         | 391.2   | I  | 2,323.2 | 1,162.1 | 2,306.2 | 2,305.2 | 21 |
| 5  | 537.3   | 269.2   | 520.3   | 519.3   | K  | 2,210.1 | 1,105.6 | 2,193.1 | 2,192.1 | 20 |
| 6  | 652.4   | 326.7   | 635.3   | 634.4   | D  | 2,082.0 | 1,041.5 | 2,065.0 | 2,064.0 | 19 |
| 7  | 799.4   | 400.2   | 782.4   | 781.4   | F  | 1,967.0 | 984.0   | 1,950.0 | 1,949.0 | 18 |
| 8  | 856.5   | 428.7   | 839.4   | 838.4   | G  | 1,819.9 | 910.5   | 1,802.9 | 1,801.9 | 17 |
| 9  | 913.5   | 457.2   | 896.5   | 895.5   | G  | 1,762.9 | 882.0   | 1,745.9 | 1,744.9 | 16 |
| 10 | 1,060.5 | 530.8   | 1,043.5 | 1,042.5 | F  | 1,705.9 | 853.4   | 1,688.9 | 1,687.9 | 15 |
| 11 | 1,175.6 | 588.3   | 1,158.5 | 1,157.6 | D  | 1,558.8 | 779.9   | 1,541.8 | 1,540.8 | 14 |
| 12 | 1,322.6 | 661.8   | 1,305.6 | 1,304.6 | F  | 1,443.8 | 722.4   | 1,426.8 | 1,425.8 | 13 |
| 13 | 1,409.7 | 705.3   | 1,392.6 | 1,391.7 | S  | 1,296.7 | 648.9   | 1,279.7 | 1,278.7 | 12 |
| 14 | 1,537.7 | 769.4   | 1,520.7 | 1,519.7 | Q  | 1,209.7 | 605.3   | 1,192.7 | 1,191.7 | 11 |
| 15 | 1,650.8 | 825.9   | 1,633.8 | 1,632.8 | I  | 1,081.6 | 541.3   | 1,064.6 | 1,063.6 | 10 |
| 16 | 1,763.9 | 882.5   | 1,746.9 | 1,745.9 | L  | 968.5   | 484.8   | 951.5   | 950.5   | 9  |
| 17 | 1,861.0 | 931.0   | 1,843.9 | 1,842.9 | P  | 855.5   | 428.2   | 838.4   | 837.4   | 8  |
| 18 | 1,976.0 | 988.5   | 1,959.0 | 1,958.0 | D  | 758.4   | 379.7   | 741.4   | 740.4   | 7  |
| 19 | 2,073.0 | 1,037.0 | 2,056.0 | 2,055.0 | P  | 643.4   | 322.2   | 626.4   | 625.4   | 6  |
| 20 | 2,160.1 | 1,080.5 | 2,143.0 | 2,142.1 | S  | 546.3   | 273.7   | 529.3   | 528.3   | 5  |
| 21 | 2,288.2 | 1,144.6 | 2,271.1 | 2,270.1 | K  | 459.3   | 230.1   | 442.3   | 441.3   | 4  |
| 22 | 2,385.2 | 1,193.1 | 2,368.2 | 2,367.2 | P  | 331.2   | 166.1   | 314.2   | 313.2   | 3  |
| 23 | 2,472.2 | 1,236.6 | 2,455.2 | 2,454.2 | S  | 234.1   | 117.6   | 217.1   | 216.1   | 2  |
| 24 | 2,618.4 | 1,309.7 | 2,601.3 | 2,600.3 | K  | 147.1   | 74.1    | 130.1   |         | 1  |

3

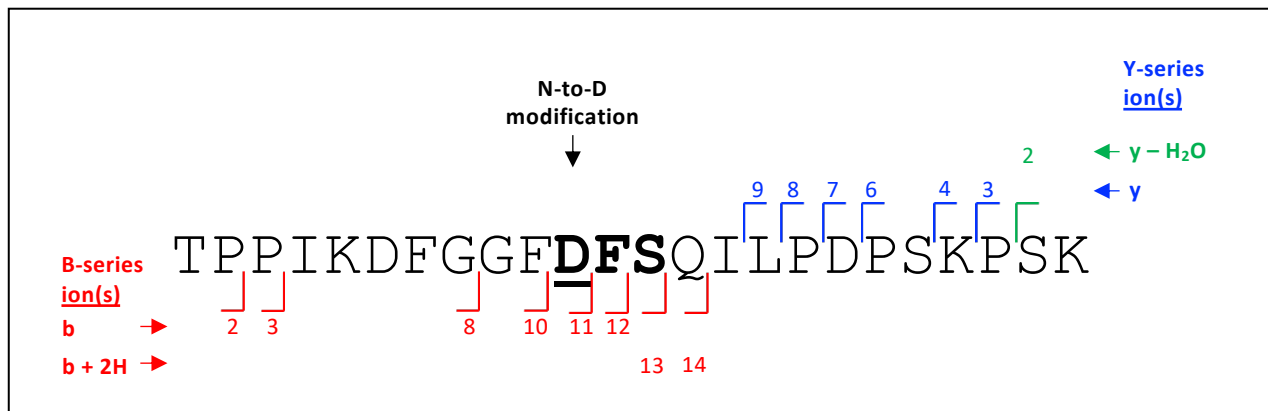

E

1

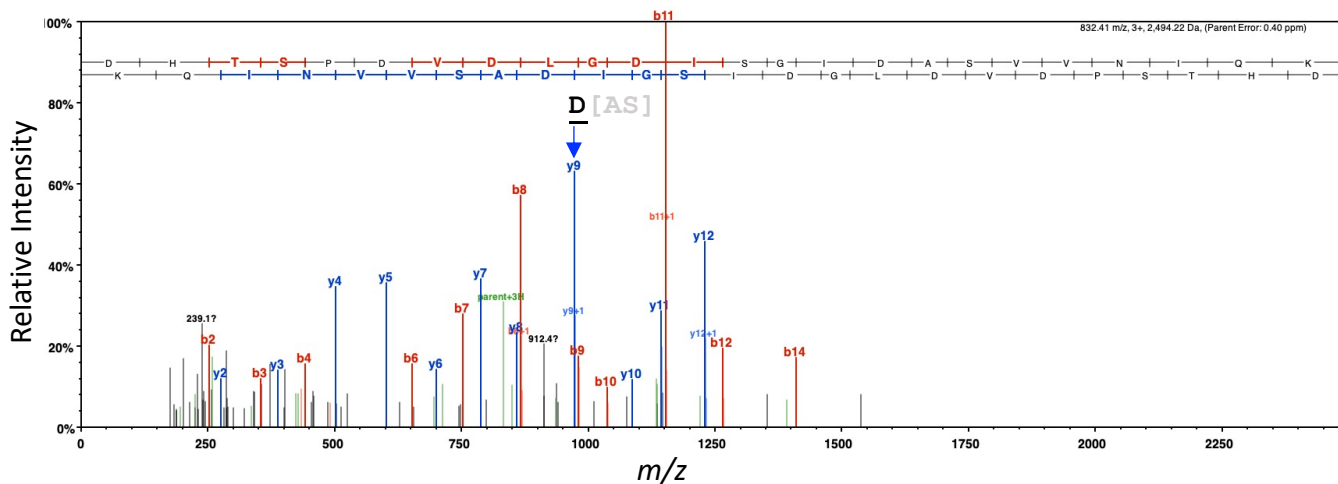

2

| B  | B Ions  | B+2H    | B-NH3   | B-H2O   | AA | Y Ions  | Y+2H    | Y-NH3   | Y-H2O   | Y  |
|----|---------|---------|---------|---------|----|---------|---------|---------|---------|----|
| 1  | 116.0   | 58.5    |         | 98.0    | D  | 2,495.2 | 1,248.1 | 2,478.2 | 2,477.2 | 24 |
| 2  | 253.1   | 127.1   |         | 235.1   | H  | 2,380.2 | 1,190.6 | 2,363.2 | 2,362.2 | 23 |
| 3  | 354.1   | 177.6   |         | 336.1   | T  | 2,243.1 | 1,122.1 | 2,226.1 | 2,225.1 | 22 |
| 4  | 441.2   | 221.1   |         | 423.2   | S  | 2,142.1 | 1,071.6 | 2,125.1 | 2,124.1 | 21 |
| 5  | 538.2   | 269.6   |         | 520.2   | P  | 2,055.1 | 1,028.0 | 2,038.0 | 2,037.1 | 20 |
| 6  | 653.3   | 327.1   |         | 635.2   | D  | 1,958.0 | 979.5   | 1,941.0 | 1,940.0 | 19 |
| 7  | 752.3   | 376.7   |         | 734.3   | V  | 1,843.0 | 922.0   | 1,826.0 | 1,825.0 | 18 |
| 8  | 867.3   | 434.2   |         | 849.3   | D  | 1,743.9 | 872.5   | 1,726.9 | 1,725.9 | 17 |
| 9  | 980.4   | 490.7   |         | 962.4   | L  | 1,628.9 | 814.9   | 1,611.9 | 1,610.9 | 16 |
| 10 | 1,037.5 | 519.2   |         | 1,019.4 | G  | 1,515.8 | 758.4   | 1,498.8 | 1,497.8 | 15 |
| 11 | 1,152.5 | 576.7   |         | 1,134.5 | D  | 1,458.8 | 729.9   | 1,441.8 | 1,440.8 | 14 |
| 12 | 1,265.6 | 633.3   |         | 1,247.6 | I  | 1,343.8 | 672.4   | 1,326.7 | 1,325.7 | 13 |
| 13 | 1,352.6 | 676.8   |         | 1,334.6 | S  | 1,230.7 | 615.8   | 1,213.6 | 1,212.7 | 12 |
| 14 | 1,409.6 | 705.3   |         | 1,391.6 | G  | 1,143.6 | 572.3   | 1,126.6 | 1,125.6 | 11 |
| 15 | 1,522.7 | 761.9   |         | 1,504.7 | I  | 1,066.6 | 543.8   | 1,069.6 | 1,068.6 | 10 |
| 16 | 1,637.7 | 819.4   |         | 1,619.7 | D  | 973.5   | 487.3   | 956.5   | 955.5   | 9  |
| 17 | 1,708.8 | 854.9   |         | 1,690.8 | A  | 858.5   | 429.8   | 841.5   | 840.5   | 8  |
| 18 | 1,795.8 | 898.4   |         | 1,777.8 | S  | 787.5   | 394.2   | 770.4   | 769.5   | 7  |
| 19 | 1,894.9 | 947.9   |         | 1,876.9 | V  | 700.4   | 350.7   | 683.4   |         | 6  |
| 20 | 1,993.9 | 997.5   |         | 1,975.9 | V  | 601.4   | 301.2   | 584.3   |         | 5  |
| 21 | 2,108.0 | 1,054.5 | 2,091.0 | 2,090.0 | N  | 502.3   | 251.7   | 485.3   |         | 4  |
| 22 | 2,221.1 | 1,111.0 | 2,204.0 | 2,203.1 | I  | 388.3   | 194.6   | 371.2   |         | 3  |
| 23 | 2,349.1 | 1,175.1 | 2,332.1 | 2,331.1 | Q  | 275.2   | 138.1   | 258.1   |         | 2  |
| 24 | 2,495.2 | 1,248.1 | 2,478.2 | 2,477.2 | K  | 147.1   | 74.1    | 130.1   |         | 1  |

3

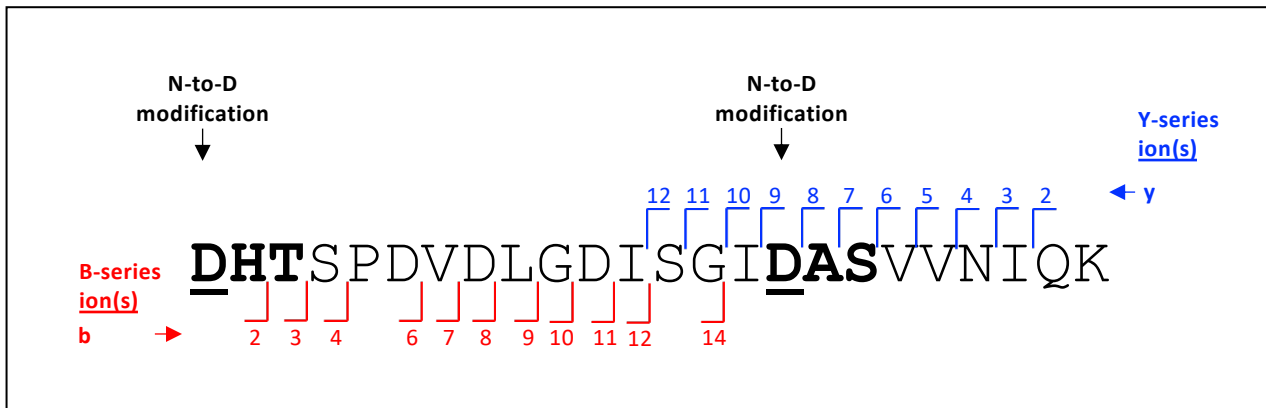

F

## &gt;tr|A0A7L9W8W9|A0A7L9W8W9\_SARS2 Surface glycoprotein OS=Severe acute respiratory syndrome coronavirus 2

OX=2697049 GN=S PE=4 SV=1

|                                   |                                          |                           |                           |                                                |                                  |                                                  |                                   |                                   |      |
|-----------------------------------|------------------------------------------|---------------------------|---------------------------|------------------------------------------------|----------------------------------|--------------------------------------------------|-----------------------------------|-----------------------------------|------|
| QCV <sup>1</sup> <u>NLT</u> TRTQ  | LPPAYTNSFT                               | RGVYYPDKVF                | RSSVLHSTQD                | LFLPFFN <sup>2</sup> <u>NVT</u>                | WFHAIHVSGT                       | <sup>3</sup> <u>NGT</u> KRFNDNPV                 | LPFNDGVYFA                        | STEKSNI IRG                       | 90   |
| WIFGTTLDSK                        | TQSL <sup>4</sup> LIVN <u>NA</u>         | TNVVIKVECF                | QFCNDPFLGV                | YYHKN <sup>5</sup> <u>NKS</u> WM               | ESEFRVYSSA                       | <sup>6</sup> <u>NCT</u> FEYVSQ                   | PFLMDLEGKQ                        | GNFKNLREFV                        | 180  |
| FKNIDGYFKI                        | YSKHTPINLV                               | RDL <sup>7</sup> PQGFSAL  | EPLVDLPIGI                | <sup>8</sup> <u>NIT</u> RFQTL <sup>9</sup> LLA | LHRSYLTPGD                       | SSSGWTAGAA                                       | AYYVGYLQPR                        | TFL <sup>8</sup> LLKYNE <u>NG</u> | 270  |
| <sup>10</sup> <u>TIT</u> DAVDCAL  | DPLSETKCTL                               | KSFTVEKGIY                | QTSNFRVQPT                | ESIVRFP <sup>11</sup> <u>NIT</u>               | NLCPFGEVFN                       | <sup>12</sup> <u>AT</u> RFASVYAW                 | NRKRISNCVA                        | DYSILYNSAS                        | 360  |
| FSTFKCYGVS                        | PTKLN <sup>13</sup> DL <sup>14</sup> CFT | NVYADSFVIR                | GDEV <sup>15</sup> RQIAPG | QTGKIADYNY                                     | KLPDDFTGCV                       | IAWNSNNLDS                                       | KVGGNYNYLY                        | RLFRKSNLKP                        | 450  |
| FERDISTEYI                        | QAGSTPCNGV                               | EGFNCYFPLQ                | SYGFQPTNGV                | GYQP <sup>16</sup> YRVVVL                      | SFELLHAPAT                       | VCGPKKSTNL                                       | VKNKCVNFNF                        | NGLTGTGVLT                        | 540  |
| ESNKKFLPFQ                        | QFGRDIADTT                               | DAVRDPQ <sup>17</sup> TLE | ILDITPCSEFG               | GVS <sup>18</sup> VITPGTN                      | <sup>19</sup> <u>TS</u> NQVAVLYQ | GV <sup>20</sup> <u>NCT</u> EV <sup>21</sup> PVA | IHADQLTPTW                        | RVYSTGNSVF                        | 630  |
| QTRAGCLIGA                        | EHV <sup>22</sup> <u>NNS</u> YECD        | IPIGAGICAS                | YQTQ <sup>23</sup> TNSPRR | ARSVASQ <sup>24</sup> SII                      | AYTMSLGAEN                       | SVAYS <sup>25</sup> <u>NNS</u> IA                | IPT <sup>26</sup> <u>NFT</u> ISVT | TEILPVSMTK                        | 720  |
| TSVDCTMYIC                        | GDSTEC <sup>27</sup> SNLL                | LQYGSFCTQL                | NRAL <sup>28</sup> TGIAVE | QDKNTQEVFA                                     | QVKQIYKTPP                       | IKDFGGF <sup>29</sup> <u>NFS</u>                 | QILPDPSPKS                        | KRSFIEDLLF                        | 810  |
| NKVTLADAGF                        | IKQYGDCLGD                               | IAARDLICAQ                | KFNGLTVLPP                | LLTDEMIAQY                                     | TSALLAGTIT                       | SGWTFGAGAA                                       | LQIPFAMQMA                        | YRFNGIGVTQ                        | 900  |
| NVLYENQKLI                        | ANQFN <sup>30</sup> SAIGK                | IQDSL <sup>31</sup> SSTAS | ALGKLQDVVN                | QNAQALNTLV                                     | KQLSSNFGAI                       | SSVLNDILSR                                       | LDKVEAEVQI                        | DRLITGRLQS                        | 990  |
| LQTYVTQQLI                        | RAAEIRASAN                               | LAATKMSECV                | LGQSKRVDFC                | GKGYHLMSEF                                     | QSAPHGVVFL                       | HVTYVPAQEK                                       | <sup>32</sup> <u>NFT</u> TAPAICH  | DGKAHPREG                         | 1080 |
| VFVS <sup>33</sup> <u>NGT</u> HWF | VTQRNFYEPQ                               | IITDNTFVS                 | GNC <sup>34</sup> DVVIGIV | <sup>35</sup> <u>NNT</u> VYDPLQ <sup>36</sup>  | ELDSFKEELD                       | KYFK <sup>37</sup> <u>NHT</u> SPD                | VDLGDISG <sup>38</sup> <u>IN</u>  | <sup>39</sup> <u>AS</u> VVNIQKEI  | 1170 |
| DRLNEVAKNL                        | <sup>40</sup> <u>NES</u> LIDLQEL         | GKYEQYIKWP                | WYIWLGFIAG                | LIAIVMVTIM                                     | LCCMTSCCSC                       | LKGCCSCGSC                                       | CKFDEDDSEP                        | VLKGVKLHYT                        | 1260 |

## &gt;tr|A0A7L9W8W9|A0A7L9W8W9\_NDM\_SARS2 Surface glycoprotein OS=Severe acute respiratory syndrome coronavirus 2

OX=2697049 GN=S PE=4 SV=1\_Mature protein with N-to-D modification in potential N-glycosylation sites (22)

Confirmed de-N-glycosylated peptides

|                                   |                                          |                           |                           |                                                |                                  |                                                  |                                   |                                   |      |
|-----------------------------------|------------------------------------------|---------------------------|---------------------------|------------------------------------------------|----------------------------------|--------------------------------------------------|-----------------------------------|-----------------------------------|------|
| QCV <sup>1</sup> <u>DLT</u> TRTQ  | LPPAYTNSFT                               | RGVYYPDKVF                | RSSVLHSTQD                | LFLPFFD <sup>2</sup> <u>DVT</u>                | WFHAIHVSGT                       | <sup>3</sup> <u>DGT</u> KRFNDNPV                 | LPFNDGVYFA                        | STEKSNI IRG                       | 90   |
| WIFGTTLDSK                        | TQSL <sup>4</sup> LIVN <u>DA</u>         | TNVVIKVECF                | QFCNDPFLGV                | YYHKN <sup>5</sup> <u>DKS</u> WM               | ESEFRVYSSA                       | <sup>6</sup> <u>NDCT</u> FEYVSQ                  | PFLMDLEGKQ                        | GNFKNLREFV                        | 180  |
| FKNIDGYFKI                        | YSKHTPINLV                               | <u>RDL</u> PQGFSAL        | EPLVDLPIGI                | <sup>7</sup> <u>DIT</u> RFQTL <sup>8</sup> LLA | LHRSYLTPGD                       | SSSGWTAGAA                                       | AYYVGYLQPR                        | TFL <sup>8</sup> LLKYNE <u>DG</u> | 270  |
| <u>TIT</u> DAVDCAL                | <u>DPL</u> SETKCTL                       | KSFTVEKGIY                | QTSNFRVQPT                | ESIVRFP <sup>9</sup> <u>DIT</u>                | NLCPFGEVFD                       | <sup>10</sup> <u>AT</u> RFASVYAW                 | NRKRISNCVA                        | DYSILYNSAS                        | 360  |
| FSTFKCYGVS                        | PTKLN <sup>11</sup> DL <sup>12</sup> CFT | NVYADSFVIR                | GDEV <sup>13</sup> RQIAPG | QTGKIADYNY                                     | KLPDDFTGCV                       | IAWNSNNLDS                                       | KVGGNYNYLY                        | RLFRKSNLKP                        | 450  |
| FERDISTEYI                        | QAGSTPCNGV                               | EGFNCYFPLQ                | SYGFQPTNGV                | GYQP <sup>14</sup> YRVVVL                      | SFELLHAPAT                       | VCGPKKSTNL                                       | VKNKCVNFNF                        | NGLTGTGVLT                        | 540  |
| ESNKKFLPFQ                        | QFGRDIADTT                               | DAVRDPQ <sup>15</sup> TLE | ILDITPCSEFG               | GVS <sup>16</sup> VITPGTD                      | <sup>17</sup> <u>TS</u> NQVAVLYQ | GV <sup>18</sup> <u>DCT</u> EV <sup>19</sup> PVA | IHADQLTPTW                        | RVYSTGNSVF                        | 630  |
| QTRAGCLIGA                        | EHV <sup>20</sup> <u>DNS</u> YECD        | IPIGAGICAS                | YQTQ <sup>21</sup> TNSPRR | ARSVASQ <sup>22</sup> SII                      | AYTMSLGAEN                       | SVAYS <sup>23</sup> <u>DNS</u> IA                | IPT <sup>24</sup> <u>DFT</u> ISVT | TEILPVSMTK                        | 720  |
| TSVDCTMYIC                        | GDSTEC <sup>25</sup> SNLL                | LQYGSFCTQL                | NRAL <sup>26</sup> TGIAVE | QDKNTQEVFA                                     | QVKQIYKTPP                       | IKDFGGF <sup>27</sup> <u>DFS</u>                 | <u>QILPDPSPKS</u>                 | KRSFIEDLLF                        | 810  |
| NKVTLADAGF                        | IKQYGDCLGD                               | IAARDLICAQ                | KFNGLTVLPP                | LLTDEMIAQY                                     | TSALLAGTIT                       | SGWTFGAGAA                                       | LQIPFAMQMA                        | YRFNGIGVTQ                        | 900  |
| NVLYENQKLI                        | ANQFN <sup>28</sup> SAIGK                | IQDSL <sup>29</sup> SSTAS | ALGKLQDVVN                | QNAQALNTLV                                     | KQLSSNFGAI                       | SSVLNDILSR                                       | LDKVEAEVQI                        | DRLITGRLQS                        | 990  |
| LQTYVTQQLI                        | RAAEIRASAN                               | LAATKMSECV                | LGQSKRVDFC                | GKGYHLMSEF                                     | QSAPHGVVFL                       | HVTYVPAQEK                                       | <sup>30</sup> <u>DFT</u> TAPAICH  | DGKAHPREG                         | 1080 |
| VFVS <sup>31</sup> <u>DGT</u> HWF | VTQRNFYEPQ                               | IITDNTFVS                 | GNC <sup>32</sup> DVVIGIV | <sup>33</sup> <u>DNT</u> VYDPLQ <sup>34</sup>  | ELDSFKEELD                       | KYFK <sup>35</sup> <u>DHT</u> SPD                | VDLGDISG <sup>36</sup> <u>D</u>   | <sup>37</sup> <u>AS</u> VVNIQKEI  | 1170 |
| DRLNEVAKNL                        | <sup>38</sup> <u>DES</u> LIDLQEL         | GKYEQYIKWP                | WYIWLGFIAG                | LIAIVMVTIM                                     | LCCMTSCCSC                       | LKGCCSCGSC                                       | CKFDEDDSEP                        | VLKGVKLHYT                        | 1260 |
